# Supplementary material for: Multimetal lanthanide phosphonocarboxylate frameworks: structures, colour tuning and near-infrared emission
Source: Royal Society of Chemistry journal article supplement (doi:10.1039/d1dt01052b), 2021-01-01
Supplement: d1dt01052b1.pdf [file d1dt01052b1.pdf]

Supporting Information for  
**Multimetal lanthanide phosphonocarboxylate frameworks:  
structures, colour tuning and near-infrared emission**

*Huiru Jing,<sup>a</sup> Wenyan Dan,<sup>b</sup> Jiaying Zhu,<sup>a</sup> Yun Ling,<sup>a</sup> Yu Jia,<sup>a</sup> Yongtai Yang,<sup>a</sup> Xiaofeng  
Liu<sup>a</sup>, Zhenxia Chen<sup>a,\*</sup> and Yaming Zhou<sup>a,\*</sup>*

Shanghai Key Laboratory of Molecular Catalysis and Innovative Materials,

Department of Chemistry, Fudan University, Shanghai 200438, China

E-mail:zhxchen@fudan.edu.cn; ymzhou@fudan.edu.cn

## Table of Contents

|                                                                                   |         |
|-----------------------------------------------------------------------------------|---------|
| <b>Section 1. Details of synthesis.</b>                                           | S2-S3   |
| <b>Section 2. The crystal data and structural refinement parameters for LnPCF</b> | S4      |
| <b>Section 3. Description of single crystal structure.</b>                        | S5-S6   |
| <b>Section 4. Supporting Characterizations of LnPCF</b>                           | S7-S8   |
| <b>Section 5. Supporting Characterizations of mixed metal LnPCF</b>               | S9-S12  |
| <b>Section 6. Luminescence properties</b>                                         | S13-S19 |

## Section 1. Details of synthesis.

### Synthesis of TbPCF.

Tb(NO<sub>3</sub>)<sub>3</sub>·6H<sub>2</sub>O (0.023 g, 0.05 mmol), H<sub>4</sub>pbpdc (0.016 g, 0.05 mmol), DMF (4 mL), deionized water (2 mL) were added to the Teflon reactor, heated at 140 °C for 48 hours, then slowly cooled to room temperature. The product was washed with DMF, ethanol, centrifuged, and dried to obtain colorless needle crystals. Yield: 55%. Elemental Analysis: Found (%) C 33.19, N 1.57, H 2.69; Calc. (%) C 33.00, N 1.60, H 2.58. FT-IR: (KBr 4000 - 400 cm<sup>-1</sup>): 3256(b), 1655(s), 1610(s), 1547(vs), 1508(m), 1470(m), 1443(s), 1406(s), 1383(s), 1162(s), 1139(s), 1054(m), 1025(m), 988(s), 796(w), 779(m), 737(m), 706(s), 600(m), 552(w).

### Synthesis of EuPCF.

Eu(NO<sub>3</sub>)<sub>3</sub>·6H<sub>2</sub>O (0.023 g, 0.05mmol), H<sub>4</sub>pbpdc (0.016 g, 0.05 mmol), DMF (4 mL), deionized water (2 mL) were added to the Teflon reactor, heated at 140 °C for 48 hours, then slowly cooled to room temperature. The product was washed with DMF, ethanol, centrifuged, and dried to obtain colorless needle crystals. Yield: 52%. Elemental Analysis: Found (%) C 33.75, N 1.60, H 2.78; Calc. (%) C 33.47, N 1.63, H 2.61. FT-IR: (KBr 4000 - 400 cm<sup>-1</sup>): 3256(b), 1655(s), 1610(s), 1545(vs), 1470(m), 1444(s), 1406(s), 1381(s), 1161(s), 1139(s), 1054(m), 1025(m), 988(s), 795(w), 779(m), 737(m), 706(s), 600(m), 552(w).

### Synthesis of GdPCF.

Gd(NO<sub>3</sub>)<sub>3</sub>·6H<sub>2</sub>O (0.023 g, 0.05mmol), H<sub>4</sub>pbpdc (0.016 g, 0.05 mmol), DMF (4 mL), deionized water (2 mL) were added to the Teflon reactor, heated at 140 °C for 48 hours, then slowly cooled to room temperature. The product was washed with DMF, ethanol, centrifuged, and dried to obtain colorless needle crystals. Yield: 60%. Elemental Analysis: Found (%) C 33.21, N 1.57, H 2.68; Calc. (%) C 33.11, N 1.61, H 2.59. FT-IR: (KBr 4000 - 400 cm<sup>-1</sup>): 3255(b), 1655(s), 1610(s), 1546(vs), 1508(m), 1471(m), 1443(s), 1406(s), 1383(s), 1161(s), 1139(s), 1056(m), 1024(m), 987(s), 796(w), 779(m), 737(m), 706(s), 600(m), 552(w).

### Synthesis of NdPCF.

Nd(NO<sub>3</sub>)<sub>3</sub>·6H<sub>2</sub>O (0.022 g, 0.05 mmol), H<sub>4</sub>pbpdc (0.016 g, 0.05 mmol), DMF (4 mL), deionized water (2 mL) were added to the Teflon reactor, heated at 140 °C for 48 hours, then slowly cooled to room temperature. The product was washed with DMF, ethanol, centrifuged, and dried to obtain colorless needle crystals. Yield:46%. FT-IR: (KBr 4000 - 400 cm<sup>-1</sup>): 3256(b), 1655(s), 1610(s), 1547(vs), 1508(m), 1470(m), 1443(s), 1406(s), 1383(s), 1162(s), 1139(s), 1054(m), 1025(m), 988(s), 796(w), 779(m), 737(m), 706(s), 600(m), 552(w).

**Synthesis of Tb<sub>x</sub>Gd<sub>1-x</sub>PCF.**

Tb(NO<sub>3</sub>)<sub>3</sub>·6H<sub>2</sub>O (0.05 *x* mmol, *x* = 0.05, 0.5), Gd(NO<sub>3</sub>)<sub>3</sub>·6H<sub>2</sub>O (0.05 (1-*x*) mmol), H<sub>4</sub>pbpdc (0.05 mmol), DMF (4 mL), H<sub>2</sub>O (2 mL) were added to the Teflon reactor, heated at 140 °C for 48 hours, then slowly cooled to room temperature. The product was washed with DMF, ethanol, centrifuged, and dried to obtain colorless needle crystals.

**Synthesis of Tb<sub>x</sub>Eu<sub>1-x</sub>PCF.**

Tb(NO<sub>3</sub>)<sub>3</sub>·6H<sub>2</sub>O (0.05*x* mmol, *x* = 0.99, 0.98, 0.95, 0.9, 0.5), Eu(NO<sub>3</sub>)<sub>3</sub>·6H<sub>2</sub>O (0.05(1 - *x*) mmol), H<sub>4</sub>pbpdc (0.05 mmol), DMF (4 mL), H<sub>2</sub>O (2 mL) were added to the Teflon reactor, heated at 140 °C for 48 hours, then slowly cooled to room temperature. The product was washed with DMF, ethanol, centrifuged, and dried to obtain colorless needle crystals.

**Synthesis of Tb<sub>0.5</sub>Nd<sub>0.5</sub>PCF.**

Tb(NO<sub>3</sub>)<sub>3</sub>·6H<sub>2</sub>O (0.012 g, 0.025 mmol), Nd(NO<sub>3</sub>)<sub>3</sub>·6H<sub>2</sub>O (0.012 g, 0.025 mmol), H<sub>4</sub>pbpdc (0.016 g, 0.05 mmol), DMF (4 mL), H<sub>2</sub>O (2 mL) were added to the Teflon reactor, heated at 140 °C for 48 hours, then slowly cooled to room temperature. The product was washed with DMF, ethanol, centrifuged, and dried to obtain colorless needle crystals.

**Synthesis of Tb<sub>x</sub>Gd<sub>0.5</sub>Nd<sub>0.5-x</sub>PCF.**

Tb(NO<sub>3</sub>)<sub>3</sub>·6H<sub>2</sub>O (0.025*x* mmol, *x* = 0.3, 0.4), Gd(NO<sub>3</sub>)<sub>3</sub>·6H<sub>2</sub>O (0.025 mmol), Nd(NO<sub>3</sub>)<sub>3</sub>·6H<sub>2</sub>O (0.025 - 0.025*x* mmol), H<sub>4</sub>pbpdc (0.05 mmol), DMF (4 mL), H<sub>2</sub>O (2 mL) were added to the Teflon reactor, heated at 140 °C for 48 hours, then slowly cooled to room temperature. The product was washed with DMF, ethanol, centrifuged, and dried to obtain colorless needle crystals.

## Section 2. The crystal data and structural refinement parameters for LnPCF

**Table S1.** Crystal data and structure refinements for TbPCF, GdPCF and EuPCF.

|                                                                              | <b>TbPCF</b>                                                                                  | <b>GdPCF</b>                                                                                  | <b>EuPCF</b>                                                                                  |
|------------------------------------------------------------------------------|-----------------------------------------------------------------------------------------------|-----------------------------------------------------------------------------------------------|-----------------------------------------------------------------------------------------------|
| Empirical formula                                                            | C <sub>96</sub> H <sub>90</sub> N <sub>4</sub> O <sub>49</sub> P <sub>6</sub> Tb <sub>7</sub> | C <sub>96</sub> H <sub>76</sub> N <sub>4</sub> O <sub>49</sub> P <sub>6</sub> Gd <sub>7</sub> | C <sub>96</sub> H <sub>70</sub> N <sub>4</sub> O <sub>49</sub> P <sub>6</sub> Eu <sub>7</sub> |
| Formula weight                                                               | 3381.97                                                                                       | 3356.17                                                                                       | 3313.10                                                                                       |
| Crystal system                                                               | orthorhombic                                                                                  | orthorhombic                                                                                  | orthorhombic                                                                                  |
| space group                                                                  | <i>Pnnm</i>                                                                                   | <i>Pnnm</i>                                                                                   | <i>Pnnm</i>                                                                                   |
| Unit cell dimensions (Å)                                                     | 14.4585(4)                                                                                    | 14.4962(6)                                                                                    | 14.5138(5)                                                                                    |
|                                                                              | 20.3696(6)                                                                                    | 20.3758(8)                                                                                    | 20.4301(8)                                                                                    |
|                                                                              | 22.7805(7)                                                                                    | 22.8688(11)                                                                                   | 22.9139(9)                                                                                    |
| $\alpha, \beta, \gamma$ (°)                                                  | 90                                                                                            | 90                                                                                            | 90                                                                                            |
| Volume (Å <sup>3</sup> )                                                     | 6709.2(3)                                                                                     | 6754.8(5)                                                                                     | 6794.4(4)                                                                                     |
| Z                                                                            | 2                                                                                             | 2                                                                                             | 2                                                                                             |
| D (g·cm <sup>-3</sup> )                                                      | 1.674                                                                                         | 1.650                                                                                         | 1.619                                                                                         |
| Theta range for data collection (°)                                          | 3.261-61.985                                                                                  | 3.140-61.957                                                                                  | 3.136-64.363                                                                                  |
| Index ranges                                                                 | -18<h<19;<br>-26<k<26;<br>-29<l<24                                                            | -13<h<18;<br>-25<k<26;<br>-30<l<18                                                            | -19<h<15;<br>-26<k<21;<br>-26<l<29                                                            |
| <i>F</i> (000)                                                               | 3262                                                                                          | 3220                                                                                          | 3194                                                                                          |
| Collected / unique                                                           | 45729/8164                                                                                    | 48154/ 8210                                                                                   | 43814/8611                                                                                    |
| GOF on <i>F</i> <sup>2</sup>                                                 | 1.031                                                                                         | 1.048                                                                                         | 1.109                                                                                         |
| <i>R</i> <sub>1</sub> <sup>[a]</sup> , <i>wR</i> <sub>2</sub> <sup>[b]</sup> | 0.0562, 0.1531                                                                                | 0.0567, 0.1571                                                                                | 0.0550, 0.1519                                                                                |
| <i>R</i> <sub>1</sub> , <i>wR</i> <sub>2</sub> (all data)                    | 0.0837, 0.1703                                                                                | 0.0789, 0.1742                                                                                | 0.0617, 0.1585                                                                                |

[a]  $R_1 = \sum ||F_o| - |F_c|| / \sum |F_o|$ . [b]  $wR_2 = [\sum w(F_o^2 - F_c^2)^2 / \sum w(F_o^2)^2]^{1/2}$

### Section 3. Description of single crystal structure.

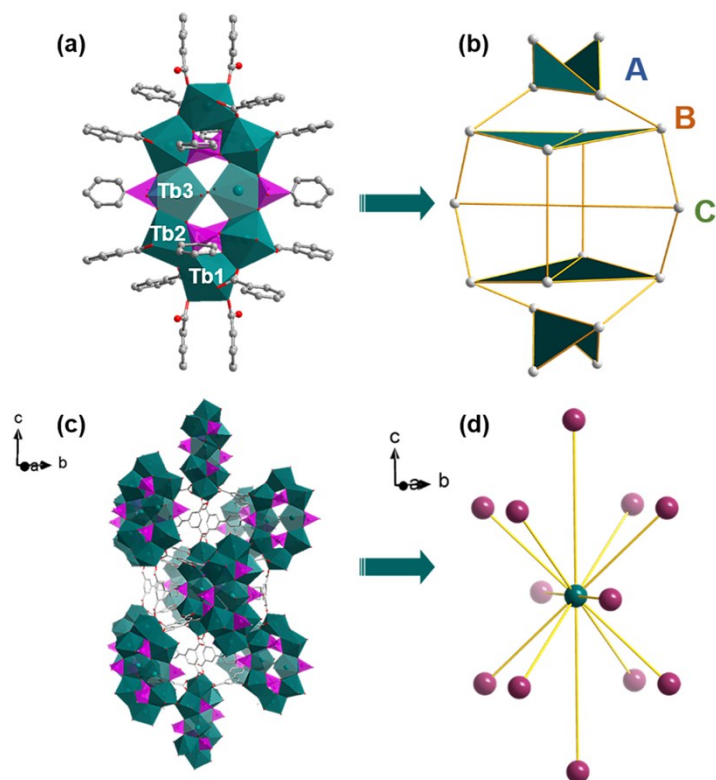

**Fig. S1:** (a) The 18-connected Tb<sub>7</sub>-cluster. (b) The 18 nodes of Tb<sub>7</sub>-cluster is divided into three parts (A, B and C). (c) (d) The 18-connected Tb<sub>7</sub>-cluster is linked to another twelve Tb<sub>7</sub>-clusters by triangular pbpdC<sup>4-</sup> ligands.

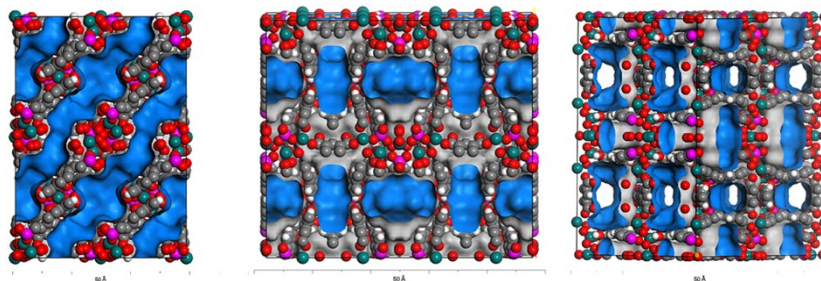

**Fig. S2:**  $2 \times 2 \times 2$  unit cell of TbPCF (the blue surface is the Connolly surface calculated by the probe radii of  $1.4 \text{ \AA}$ ) shows the 1D ultra-micro channel ( $4.1 \times 3.8 \text{ \AA}^2$ ).

## Section 4. Supporting Characterizations of LnPCF

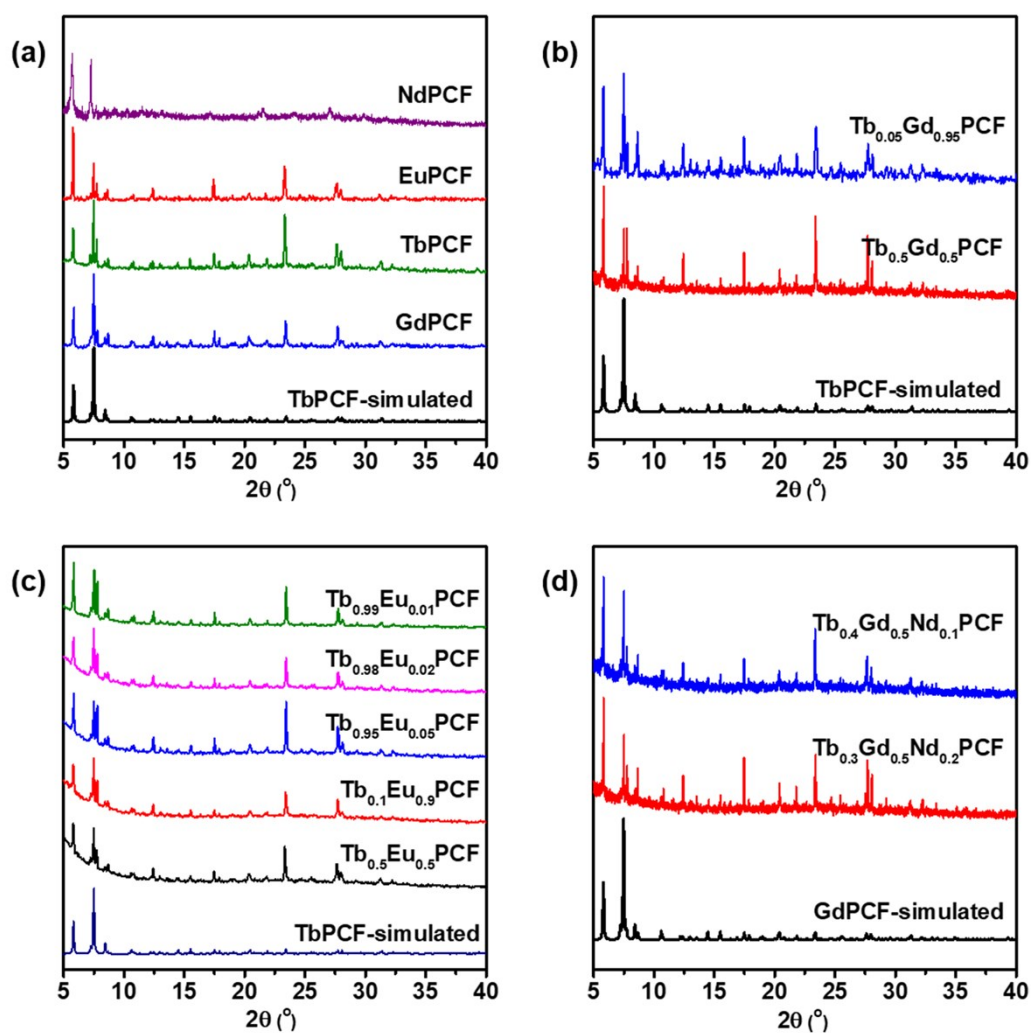

**Fig. S3** PXR patterns of (a) LnPCF (Ln= Tb, Gd, Eu, Nd). (b)  $Tb_{0.05}Gd_{0.95}PCF$  and  $Tb_{0.5}Gd_{0.5}PCF$ . (c)  $Tb_{0.99}Eu_{0.01}PCF$ ,  $Tb_{0.98}Eu_{0.02}PCF$ ,  $Tb_{0.95}Eu_{0.05}PCF$ ,  $Tb_{0.9}Eu_{0.1}PCF$ , and  $Tb_{0.5}Eu_{0.5}PCF$ . (d)  $Tb_{0.4}Gd_{0.5}Nd_{0.1}PCF$  and  $Tb_{0.3}Gd_{0.5}Nd_{0.2}PCF$ .



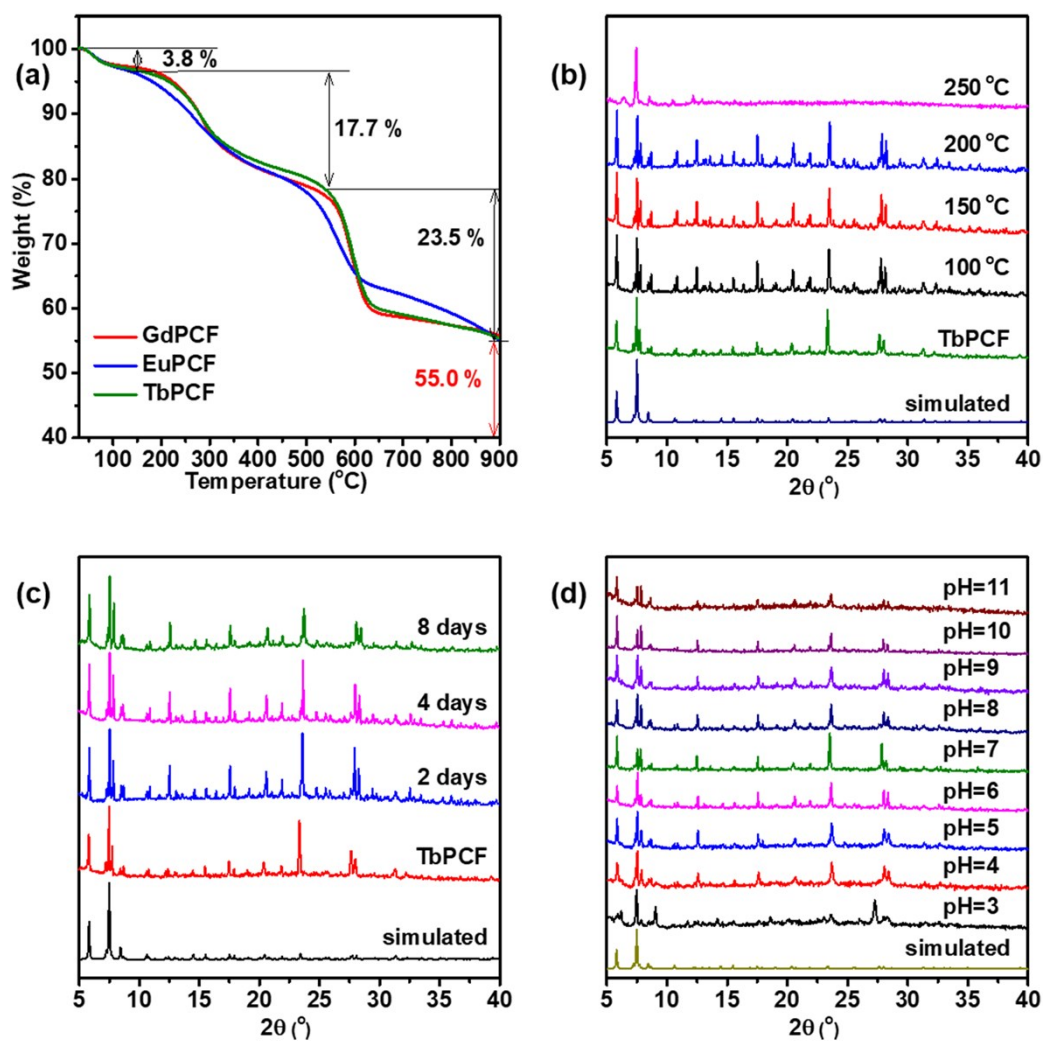

**Fig. S4** (a) The TGA curves of TbPCF, GdPCF and EuPCF. (b) Temperature dependent PXRD patterns of TbPCF. (c) PXRD patterns of TbPCF after being immersed in water for different time. (d) PXRD patterns of TbPCF after being immersed in different pH (3-11) solutions.

## Section 5. Supporting Characterizations of mixed metal LnPCFs

**Table S2.** The lanthanide molar ratios of the mixed metal LnPCFs in precursors and calculated from ICP-AES.

|                                                            | Molar ratios in precursors |          |            | Molar ratios calculated from ICP |          |            |
|------------------------------------------------------------|----------------------------|----------|------------|----------------------------------|----------|------------|
|                                                            | Tb (x)                     | Gd (1-x) |            | Tb (x)                           | Gd (1-x) |            |
| <b>Tb<sub>x</sub>Gd<sub>1-x</sub>PCF</b>                   | 0.05                       | 0.95     |            | 0.059                            | 0.941    |            |
|                                                            | 0.50                       | 0.50     |            | 0.525                            | 0.475    |            |
| <b>Tb<sub>x</sub>Eu<sub>1-x</sub>PCF</b>                   | Tb (x)                     | Eu (1-x) |            | Tb (x)                           | Eu (1-x) |            |
|                                                            | 0.99                       | 0.01     |            | 0.990                            | 0.010    |            |
|                                                            | 0.98                       | 0.02     |            | 0.980                            | 0.020    |            |
|                                                            | 0.95                       | 0.05     |            | 0.949                            | 0.051    |            |
|                                                            | 0.90                       | 0.10     |            | 0.897                            | 0.103    |            |
|                                                            | 0.50                       | 0.50     |            | 0.515                            | 0.485    |            |
| <b>Tb<sub>x</sub>Gd<sub>0.5</sub>Nd<sub>0.5-x</sub>PCF</b> | Tb (x)                     | Gd (0.5) | Nd (0.5-x) | Tb (x)                           | Gd (0.5) | Nd (0.5-x) |
|                                                            | 0.40                       | 0.50     | 0.10       | 0.412                            | 0.470    | 0.118      |
|                                                            | 0.30                       | 0.50     | 0.20       | 0.337                            | 0.443    | 0.220      |
| <b>Tb<sub>x</sub>Nd<sub>1-x</sub>PCF</b>                   | Tb (x)                     | Nd (1-x) |            | Tb (x)                           | Nd (1-x) |            |
|                                                            | 0.50                       | 0.50     |            | 0.446                            | 0.554    |            |

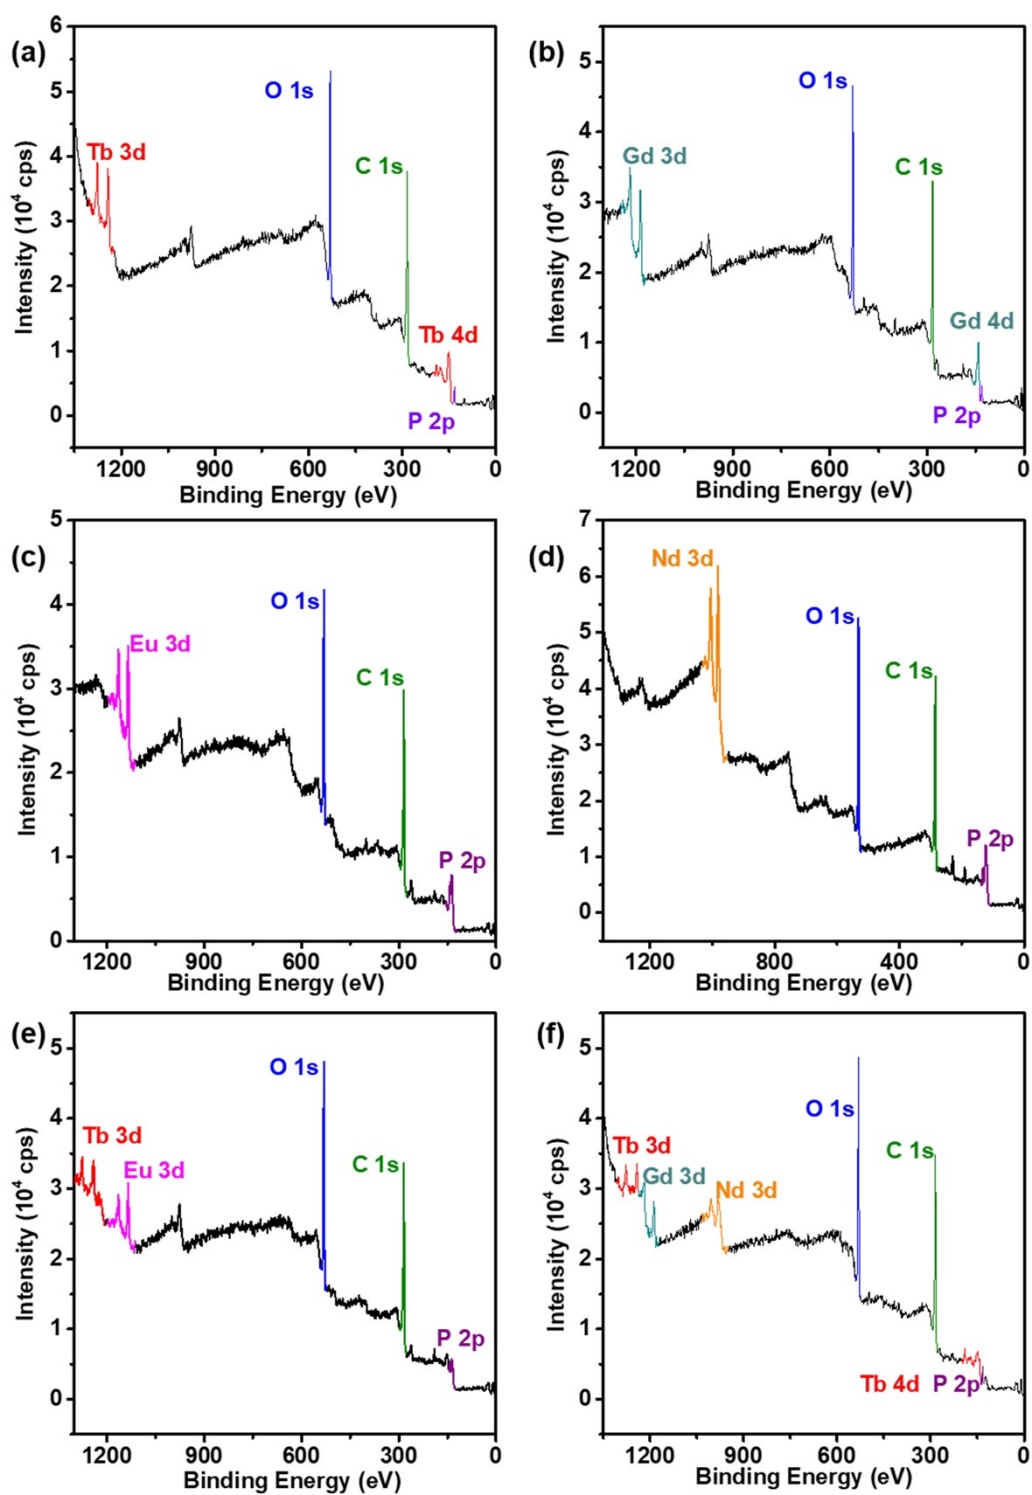

**Fig. S5** XPS spectra of (a) TbPCF. (b) GdPCF. (c) EuPCF. (d) NdPCF. (e) Tb<sub>0.5</sub>Eu<sub>0.5</sub>PCF and (f) Tb<sub>0.4</sub>Gd<sub>0.5</sub>Nd<sub>0.1</sub>PCF.

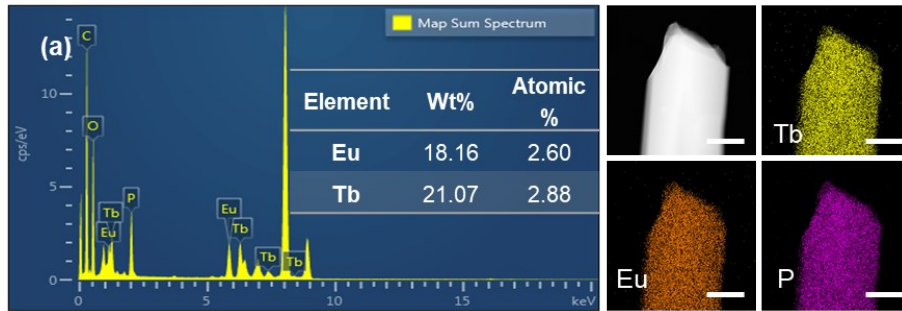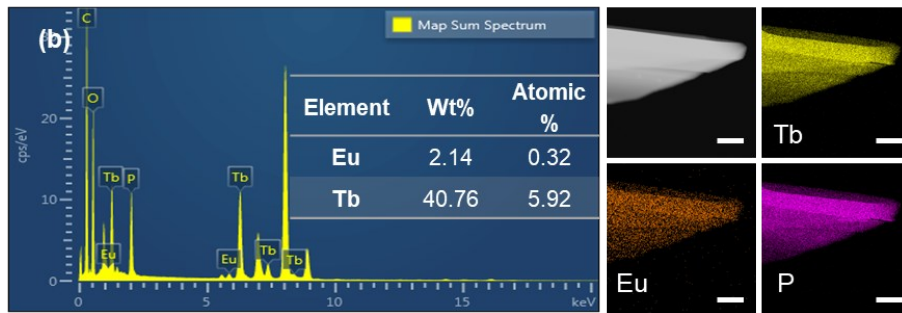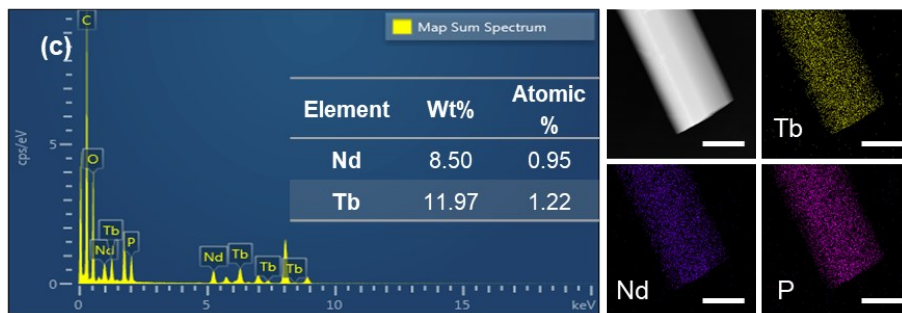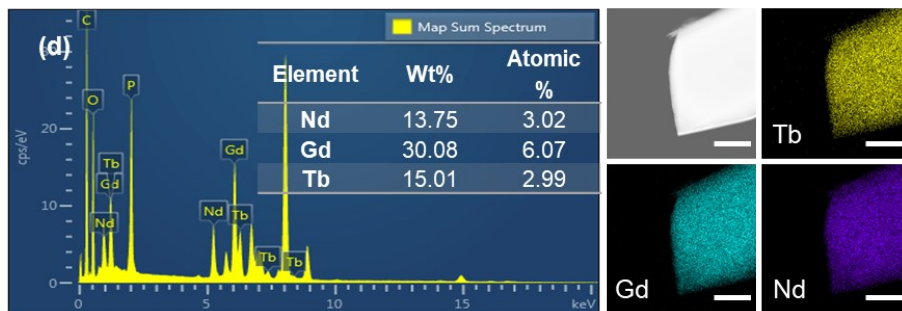

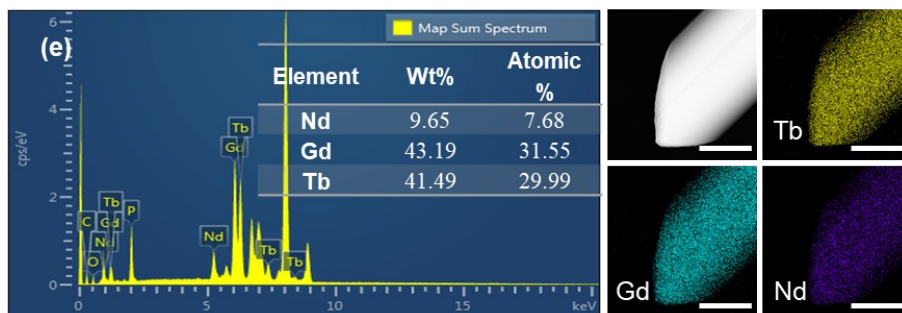

**Fig. S6:** Elemental analysis results of EDS mapping for bi- and trimetallic LnPCFs. **(a)**  $\text{Tb}_{0.5}\text{Eu}_{0.5}\text{PCF}$  (Scale bar:  $1\ \mu\text{m}$ ). **(b)**  $\text{Tb}_{0.95}\text{Eu}_{0.05}\text{PCF}$  (Scale bar:  $1\ \mu\text{m}$ ). **(c)**  $\text{Tb}_{0.5}\text{Nd}_{0.5}\text{PCF}$  (Scale bar:  $200\ \text{nm}$ ). **(d)**  $\text{Tb}_{0.3}\text{Gd}_{0.5}\text{Nd}_{0.2}\text{PCF}$  (Scale bar:  $1\ \mu\text{m}$ ). **(e)**  $\text{Tb}_{0.4}\text{Gd}_{0.5}\text{Nd}_{0.1}\text{PCF}$  (Scale bar:  $1\ \mu\text{m}$ ).

## Section 6. Luminescence properties

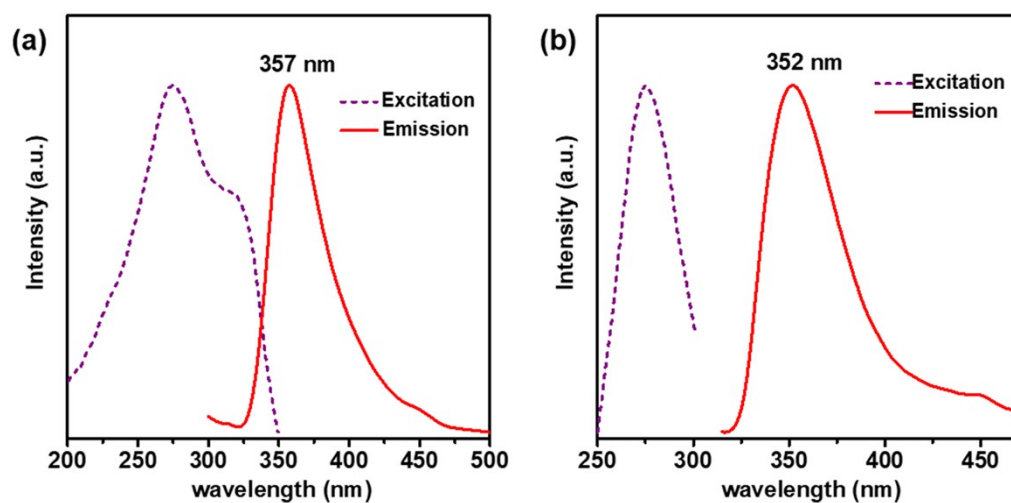

**Fig. S7 (a)** Excitation and emission spectra of H<sub>4</sub>pbpd in solid state, in which the broad emission at 357 nm was caused by  $\pi^* \rightarrow \pi$  transition. **(b)** Excitation and emission spectra of GdPCF in solid state, in which the emission band of GdPCF was similar to H<sub>4</sub>pbpd, except the peak was blue-shifted by 5 nm.

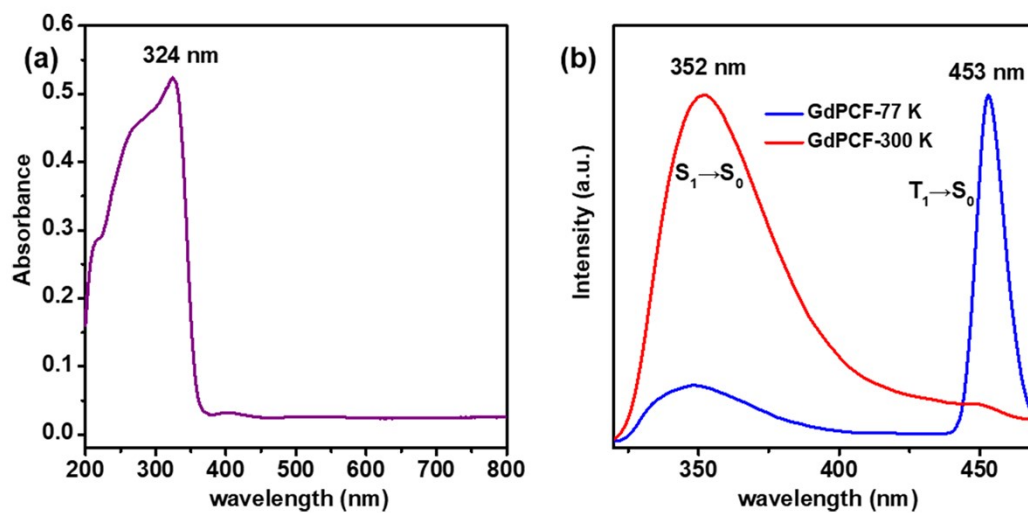

**Fig. S8 (a)** UV-vis absorption spectrum of H<sub>4</sub>pbpdC. **(b)** Normalized emission spectra of GdPCF at 300 K and 77 K.

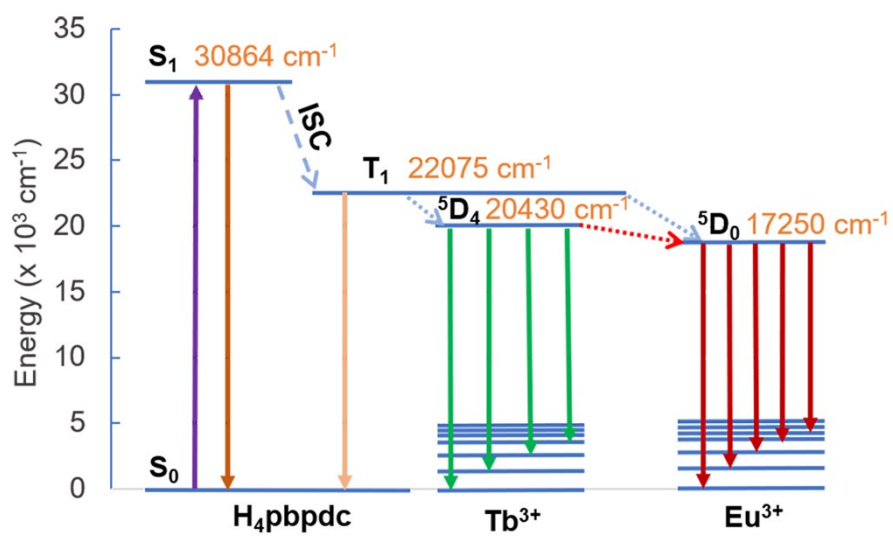

**Scheme S1.** The schematic emission and “antenna effect” processed in LnPCF.



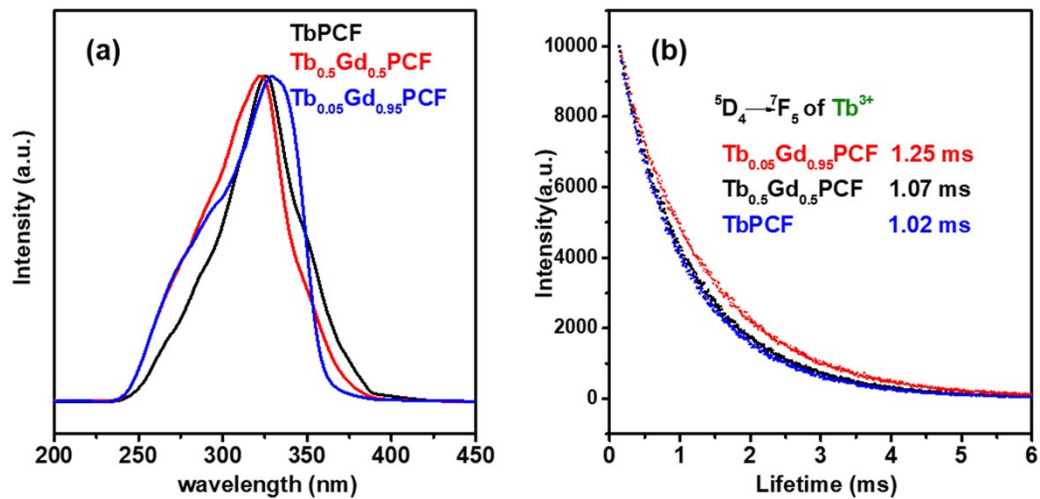

**Fig. S9** (a) Excitation spectra and (b) temporal decay curves of the TbPCF,  $Tb_{0.5}Gd_{0.5}PCF$ ,  $Tb_{0.05}Gd_{0.95}PCF$  excited at 330 nm.

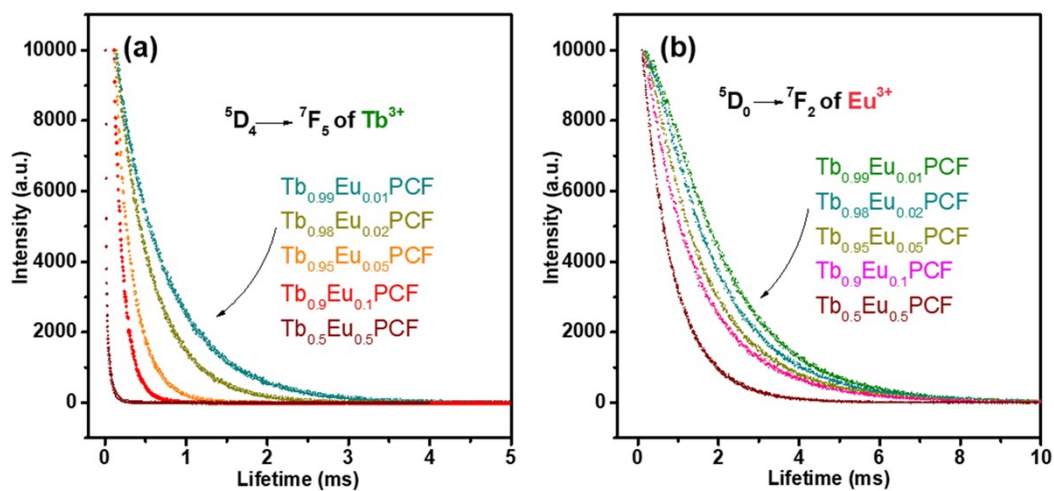

**Fig. S10.** Temporal decay curves of the  $Tb_{0.99}Eu_{0.01}PCF$ ,  $Tb_{0.98}Eu_{0.02}PCF$ ,  $Tb_{0.95}Eu_{0.05}PCF$ ,  $Tb_{0.9}Eu_{0.1}PCF$ , and  $Tb_{0.5}Eu_{0.5}PCF$ : **(a)** monitored at 545 nm ( ${}^5D_4 \rightarrow {}^7F_5$  of  $Tb^{3+}$ ); **(b)** monitored at 612 nm ( ${}^5D_0 \rightarrow {}^7F_2$  of  $Eu^{3+}$ ).

**Table S3.** The lifetimes of  $\text{Tb}^{3+}$  and  $\text{Eu}^{3+}$  in  $\text{Tb}_x\text{Eu}_{1-x}\text{PCF}$  ( $x = 0.99, 0.98, 0.95, 0.9, 0.5$ ) and corresponding energy transfer efficiency  $\eta$  between  $\text{Tb}^{3+}$  and  $\text{Eu}^{3+}$ ;  $\tau_0 = 1.02$  ms, which refers to the lifetime of  $\text{Tb}^{3+}$  in  $\text{TbPCF}$ .

|                                              | $\tau_1$ of $\text{Tb}^{3+}$ (ms) | $\tau_2$ of $\text{Eu}^{3+}$ (ms) | $\eta = 1 - \tau_1 / \tau_0$ |
|----------------------------------------------|-----------------------------------|-----------------------------------|------------------------------|
| $\text{Tb}_{0.99}\text{Eu}_{0.01}\text{PCF}$ | 0.60                              | 1.95                              | 0.412                        |
| $\text{Tb}_{0.98}\text{Eu}_{0.02}\text{PCF}$ | 0.45                              | 1.73                              | 0.559                        |
| $\text{Tb}_{0.95}\text{Eu}_{0.05}\text{PCF}$ | 0.22                              | 1.49                              | 0.784                        |
| $\text{Tb}_{0.9}\text{Eu}_{0.1}\text{PCF}$   | 0.12                              | 1.36                              | 0.882                        |
| $\text{Tb}_{0.5}\text{Eu}_{0.5}\text{PCF}$   | 0.02                              | 0.80                              | 0.980                        |

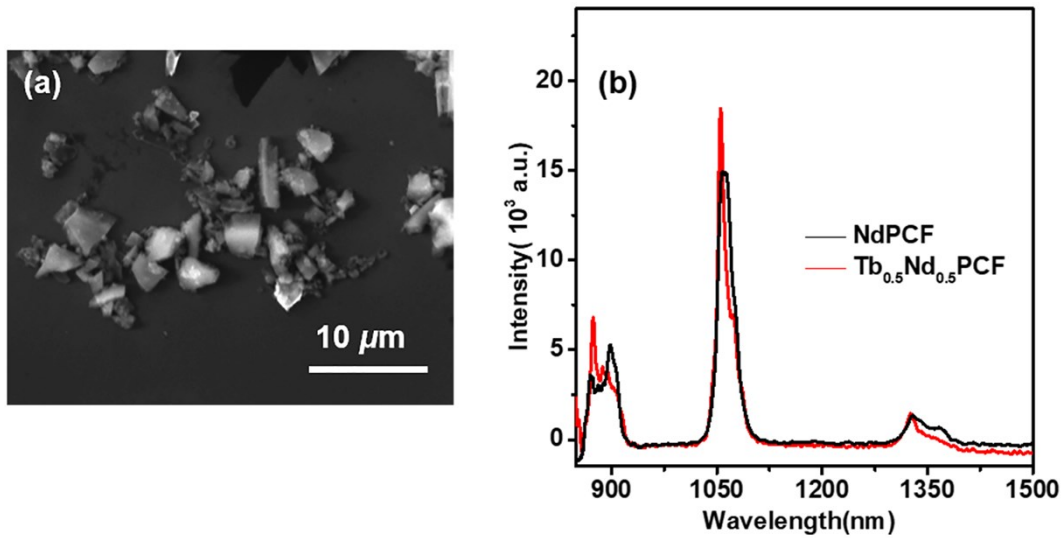

**Fig. S11. (a)** SEM of TbPCF powder after being ground. **(b)** Emission spectra of the Tb<sub>0.5</sub>Nd<sub>0.5</sub>PCF and NdPCF excited at 808 nm.
